# Supplementary material
Source: HighWire-hosted journal article supplement (https://diabetes.diabetesjournals.org/content/suppl/2005/12/28/55.1.128)
Supplement: FlorezOnlineAppendix2Pg128.pdf [file FlorezOnlineAppendix2Pg128.pdf]

| Label | IDE7<br>rs2251101 | IDE8<br>rs551266 | IDE9<br>rs1887922 | IDE10<br>rs2275218 | IDE11<br>rs2250090 | IDE12<br>rs2149632 | IDE13<br>rs2249960 | IDE14<br>rs1823196 | IDE15<br>rs2421942 | IDE16<br>rs1832197 | IDE17<br>rs2421943 | IDE18<br>rs1999764 | IDE19<br>rs2421945 | HHEX23<br>rs1544210 | Haplotype | Frequency |
|-------|-------------------|------------------|-------------------|--------------------|--------------------|--------------------|--------------------|--------------------|--------------------|--------------------|--------------------|--------------------|--------------------|---------------------|-----------|-----------|
| H1    | T                 | T                | T                 | T                  | G                  | C                  | A                  | C                  | C                  | G                  | A                  | T                  | G                  | G                   | TCG       | 28.6      |
| H2    | T                 | T                | T                 | T                  | G                  | T                  | A                  | C                  | C                  | A                  | G                  | T                  | A                  | A                   | TCA       | 20.5      |
| H3    | C                 | C                | C                 | T                  | G                  | T                  | G                  | C                  | C                  | G                  | G                  | T                  | G                  | A                   | CCA       | 11.7      |
| H4    | T                 | T                | T                 | C                  | G                  | T                  | A                  | T                  | G                  | A                  | G                  | T                  | A                  | A                   | TTA       | 6.2       |
| H5    | T                 | T                | T                 | T                  | G                  | T                  | A                  | T                  | C                  | A                  | G                  | C                  | A                  | G                   | TTG       | 6.2       |
| H6    | T                 | T                | T                 | T                  | G                  | C                  | A                  | C                  | C                  | G                  | A                  | T                  | G                  | A                   | TCA       | 4.4       |
| H7    | C                 | T                | T                 | T                  | G                  | T                  | A                  | C                  | C                  | A                  | A                  | T                  | G                  | G                   | CCG       | 3.5       |
| H8    | C                 | C                | C                 | T                  | G                  | T                  | A                  | C                  | C                  | G                  | G                  | T                  | G                  | A                   | CCA       | 2.7       |
| H9    | T                 | T                | T                 | T                  | G                  | C                  | A                  | C                  | C                  | A                  | A                  | T                  | G                  | G                   | TCG       | 2.1       |
| H10   | C                 | T                | T                 | T                  | A                  | T                  | A                  | C                  | C                  | G                  | A                  | T                  | G                  | G                   | CCG       | 2.0       |
| H1+H6 | T                 |                  | T                 | T                  |                    |                    | A                  |                    |                    | G                  |                    | T                  | G                  |                     | TTTAGTG   | 32.6      |
| H2    | T                 |                  | T                 | T                  |                    |                    | A                  |                    |                    | A                  |                    | T                  | A                  |                     | TTTAATA   | 23.5      |
| H3    | C                 |                  | C                 | T                  |                    |                    | G                  |                    |                    | G                  |                    | T                  | G                  |                     | CCTGGTG   | 6.1       |
| H4    | T                 |                  | T                 | C                  |                    |                    | A                  |                    |                    | A                  |                    | T                  | A                  |                     | TTCAATA   | 5.1       |
| H5    | T                 |                  | T                 | T                  |                    |                    | A                  |                    |                    | A                  |                    | C                  | A                  |                     | TTTAACA   | 8.5       |
| H7    | C                 |                  | T                 | T                  |                    |                    | A                  |                    |                    | A                  |                    | T                  | G                  |                     | CTTAATG   | 1.8       |
| H8    | C                 |                  | C                 | T                  |                    |                    | A                  |                    |                    | G                  |                    | T                  | G                  |                     | CCTAGTG   | 10.6      |
| H9    | T                 |                  | T                 | T                  |                    |                    | A                  |                    |                    | A                  |                    | T                  | G                  |                     | TTTAATG   | 1.7       |
| H10   | C                 |                  | T                 | T                  |                    |                    | A                  |                    |                    | G                  |                    | T                  | G                  |                     | CTTAGTG   | 2.6       |
