# Supplementary material
Source: HighWire-hosted journal article supplement (https://diabetes.diabetesjournals.org/content/suppl/2005/12/28/55.1.128)
Supplement: FlorezOnlineAppendixPg128.pdf [file FlorezOnlineAppendixPg128.pdf]

Supplementary Fig. 2 (online Appendix): Reconstruction (bottom panel) of the haplotypes described by Gu *et al.* (10) (top panel). We used four of our tag SNPs (in bold) and three SNPs predicted by our set of tags to reconstruct the haplotypes of Gu *et al.*: rs1832197 was predicted by test 29 ( $r^2 = 0.9$ ), rs1999764 was predicted by test 28 ( $r^2 = 1.0$ ) and rs2421945 was predicted by test 27 ( $r^2 = 1.0$ ). The flanking SNP HHEX23 lies ~95 kb beyond the end of the last haplotype block, and was therefore not genotyped in our disease samples. Thus we could not resolve haplotypes H1 (frequency 28.6%) and H6 (frequency 4.4%), which were analyzed in combination in our samples. We note that haplotypes H3 and H8 cannot be distinguished with the use of the three tag SNPs by Gu *et al.* (shaded); because the G allele of rs2249960 tags haplotype H3 perfectly and its minor allele frequency is ~8% in Caucasians, we suspect that their assignment of labels H3 (frequency 11.7%) and H8 (frequency 2.7%) based on allele frequency may have been reversed. If this is the case, their allele frequencies would approximate ours closely.

## ONLINE APPENDIX TABLES

Supplementary Table 1: Genotyping assays of SNPs in *IDE*

| SNP        | Position | Base | PCR primer 1                    | PCR primer 2                    | Extension probe          | Probe direction | Assay result |
|------------|----------|------|---------------------------------|---------------------------------|--------------------------|-----------------|--------------|
| rs2263638  | 94158777 | C/T  | HapMap                          |                                 |                          |                 |              |
| rs2901587  | 94160831 | A/C  | AGCGGATAACGGTAGAAAGGCAGCTTCTAC  | AGCGGATAACCTTTGTCATTGGAGGAGACC  | GACCTCCTCATCCCCAGTTAT    | F               | Failed geno  |
| rs11186986 | 94161069 | A/G  | AGCGGATAACTTTTTGCCATGTTGGCTAGGC | AGCGGATAACTAATCCCAACACTGTGGGAG  | ACCTGAGGTCAGAAGTTC       | F               | Failed geno  |
| rs7911751  | 94163065 | C/G  | AGCGGATAACTGTACAGTAAGGAGCAGACG  | AGCGGATAACATGGTTGCCACGCTAATC    | CTCTTTCCACTTGGCCAG       | F               | MONO         |
| rs12267150 | 94164911 | A/G  | AGCGGATAACAAAGTATCTGGGTCCATGGC  | AGCGGATAACGTTTTCTCCATGTTGGTCAGG | GTTGGTCAGGATGGTCTC       | F               | Failed geno  |
| rs7086285  | 94166068 | T/C  | AGCGGATAACCCTGAACCTTGCACTTAGGTC | AGCGGATAACTTTGCCCAAGCCTCTGATAC  | TAGGGGGCATGGTTTTAGGACTTC | F               |              |
| rs12243581 | 94167669 | C/T  | AGCGGATAACCGCAGATGGTAATAATGAAGC | AGCGGATAACGGGAGTTCGAGAAAAGGTATA | GTATAAGTATGTTCTGTTGTGTAC | R               | MONO         |
| rs2209972  | 94169008 | C/T  | HapMap                          |                                 |                          |                 |              |
| rs967878   | 94169328 | G/T  | AGCGGATAACTCCTCATACTCCTCAGCAAG  | AGCGGATAACACCCCTGCAAACCTAAGTTC  | ATCCGTGGGTTACAGACAGGAAGA | R               |              |
| rs884526   | 94170442 | G/T  | AGCGGATAACTCAAAACCTTAACGGCCGC   | AGCGGATAACAAAACCTCCCGAGCCAGGA   | AGGAGATGAGCGGTGGA        | R               |              |
| rs2094645  | 94170990 | G/T  | AGCGGATAACAAGTGGCCAACCAACTTC    | AGCGGATAACTTTGAGGCTCTGTTGTTAGG  | CTGTTGTTAGGTCCCTAC       | R               | MONO         |
| rs1590827  | 94171444 | G/A  | AGCGGATAACGCTGCAACCCACAAATTTTG  | AGCGGATAACGGCCAAAGAATTCTCAAGAG  | CTCAAGAGAAATGTTAAAAAAT   | R               | MONO         |
| rs11594898 | 94173942 | T/C  | AGCGGATAACGATGGTTACCGAACATTGTG  | AGCGGATAACAAGTTGCAAGTAGGTTAAC   | TAAAAAAATCTGGTGAGATA     | F               |              |
| rs10882060 | 94174752 | G/A  | AGCGGATAACTGGCACGATCTCGGCTTACT  | AGCGGATAACAAAATTAGCTGGGCGTGGTG  | CGCCTGTAATCCAGCTA        | R               | MONO         |
| rs12257053 | 94175650 | C/T  | AGCGGATAACTGGAATAGAATTGAGAGCCC  | AGCGGATAACAACCTGAATGGTCTTGCCACC | TTGGCACCTTGTCAAAAAG      | F               |              |
| rs12773353 | 94176753 | C/T  | AGCGGATAACCCCTTTAATGTATCCCTCCAG | AGCGGATAACAGCTAGGATTACAGGCATGC  | TACAGGCATGCGCCACC        | R               | MONO         |
| rs12266510 | 94177463 | A/G  | AGCGGATAACCTTAGTATCCAAAGTGACTC  | AGCGGATAACTTGTATCATCAGTTTTGTAG  | ACAGTTTTGTAGTTTTCTCA     | R               | MONO         |
| rs7909013  | 94178323 | T/C  | AGCGGATAACAATAGGGATATTGCCAGGCG  | AGCGGATAACTTTCACTGTATTGGCCAGGC  | CCCGAAGTGCTGCGATTACAG    | R               |              |
| rs7071343  | 94178909 | A/G  | HapMap                          |                                 |                          |                 | MONO         |
| rs7071242  | 94179065 | A/G  | AGCGGATAACCATCCGAGAGTACAAAAGGG  | AGCGGATAACCCAGTTTTCTAGCATAGGTG  | AGGTGATGGGGTGGGTAAA      | F               | MONO         |
| rs10786044 | 94180560 | A/G  | AGCGGATAACAGTGCCTTGGATAAGGCAG   | AGCGGATAACAGCAGACCCCAATGAAGTTC  | TTCTCCTACTTCTTAGTC       | F               |              |
| rs11186993 | 94182794 | C/T  | AGCGGATAACTGGAGGGACAAGGGAAAAAG  | AGCGGATAACAATCACTAAGGAGGGCTTCC  | GGGCTTCCCTTCTGAATAAAAT   | R               |              |
| rs12255071 | 94183825 | C/T  | AGCGGATAACATCATGCTACTGCACTCCAG  | AGCGGATAACGAGTTGCTGGTATTACAGGC  | AAACAGGATCTCCGTCTG       | F               | Failed geno  |
| rs11186994 | 94184819 | C/T  | AGCGGATAACCTCAAAACCCATTCTCTGGC  | AGCGGATAACAGCCTGGGTGACAGAATAAG  | CTGGGTGACAGAATAAGACTCCGT | F               |              |
| rs10786045 | 94185388 | A/T  | HapMap                          |                                 |                          |                 |              |
| rs10786046 | 94185800 | A/G  | AGCGGATAACGAGAAAGAATCAGATCCCGG  | AGCGGATAACCCACCCAGATCTTGCTTTTC  | GCTTTTCCCTCCATCTTTTC     | F               | Failed HW    |
| rs12261262 | 94186670 | G/C  | AGCGGATAACTGTAATCCAGCACTTTGCG   | AGCGGATAACTTTACCATGTTGGTCAGGC   | CTCCTGACCTCAGATGATCCACC  | R               | MONO         |
| rs10882063 | 94189317 | G/T  | AGCGGATAACGTTATTATTCTCTGCTATGG  | AGCGGATAACATTTTTCAGGTTACTCTTATT | TTTCAGGTTACTCTTATTTGTAA  | F               |              |
| rs12267443 | 94189686 | C/T  | AGCGGATAACTTCTAGTTTCCGTGGCATGC  | AGCGGATAACAAAGCGAAAGCCTCAGAAGC  | CCCTCCTGTCTCTTCCC        | F               | MONO         |
| rs2771254  | 94190340 | G/T  | AGCGGATAACACAAGACACATATCATTGAC  | AGCGGATAACTGACAAAAAATCATGGCAGGC | GGCCATAGTTTCCAACCT       | F               | MONO         |
| rs10882064 | 94190749 | C/T  | AGCGGATAACAGGTGATTCTCCTCTCTCAG  | AGCGGATAACCCCTGGCCAACATGGTAAAAC | AAAACCTGTCTCTACTAAAA     | R               | MONO         |
| rs11186997 | 94191026 | C/T  | AGCGGATAACTTTGGGAGGCCAAGTGAGCG  | AGCGGATAACCCACCTGAGTAGTTGGGATC  | TTGGGATCACAGGCGCC        | F               | MONO         |
| rs2798253  | 94192885 | C/G  | AGCGGATAACTCCACAACATAAGGTAGGG   | AGCGGATAACAAGTGTAGGATTACAGGCG   | CAGCCAATGAACCCGGG        | F               |              |
| rs11186999 | 94193961 | C/G  | AGCGGATAACACTCCTGACTTCAGGTGATC  | AGCGGATAACCCAGCTTTTTAGTTGCTAC   | GGCTTACGCATGTAATCC       | F               |              |
| rs4933231  | 94196162 | C/T  | AGCGGATAACTGGATGTCCTTTGGGTAAC   | AGCGGATAACAGGATTATAGACGTGAGCCA  | CCACTAAGCCTGGCCCTTTTGG   | F               |              |
| rs11187001 | 94196306 | C/T  | AGCGGATAACACTTGTAAATCCAGCGACTC  | AGCGGATAACGAGTGCAGTGGCACAATCTC  | GGCACAATCTCAGCTCAC       | F               | Failed HW    |
| rs10786047 | 94197028 | A/G  | AGCGGATAACAGGCTAAGGTGGTTGAATTG  | AGCGGATAACCCACACCTGGCTAATTTTTG  | GGCTGGTCTGAAACTCCTGG     | F               |              |

|            |          |     |                                 |                                  |                           |   |             |
|------------|----------|-----|---------------------------------|----------------------------------|---------------------------|---|-------------|
| rs11187004 | 94199011 | G/T | AGCGGATAACGAAAAGAAAGCTCCAAGCCC  | AGCGGATAACCCTGGGAAAATCCACTTGG    | CTTGGTCATCATGTAAGGTTG     | F |             |
| rs7910977  | 94199856 | C/T | HapMap                          |                                  |                           |   |             |
| rs2251101  | 94201284 | C/T | AGCGGATAACACAGAGCGAGACTCTGTCTC  | AGCGGATAACTGATACATGGAGGGACTCAG   | AGGGGACTCAGCAGGTCCCCCT    | R |             |
| rs7896688  | 94201876 | A/G | AGCGGATAACAAATAGTACAGTGGCCAGTC  | AGCGGATAACTCACTGCTTTCTGCATTATG   | ACTGCTTTCTGCATTATGAACAAT  | F | MONO        |
| rs913648   | 94202722 | A/G | HapMap                          |                                  |                           |   | MONO        |
| rs4646958  | 94204339 | A/T | AGCGGATAACTCTGAATCACTTCAGGCTGC  | AGCGGATAACTAGAACTGAGGTATGCTCCC   | CCAGTGTCCGCCAAAAAA        | R |             |
| rs12356364 | 94206153 | A/G | AGCGGATAACCAAGAACATGGACGGATACC  | AGCGGATAACTGACCCTGCTCTTCTTTGTG   | TGTGCCTAGGAAATGTTGGCAGTA  | R | MONO        |
| rs6583814  | 94206524 | A/G | AGCGGATAACACAGAGTCTTGCTCTGTAC   | AGCGGATAACACACGAGGAAGCAAGTTTGC   | GCAAGTTTGCCATGTGCC        | F |             |
| rs11187009 | 94207018 | G/A | AGCGGATAACAGAGAGCAAGCAGACTCTAG  | AGCGGATAACGTAACACTGTGGTTCATCTACC | GTGGTTCATCTACCAAAAAGAGAAA | F |             |
| rs3781239  | 94207777 | G/C | AGCGGATAACAACTGGAGAAGGTGTTCTGC  | AGCGGATAACTTCTCCATCTCTTGTACCCC   | TTGTACCCCAAACCTTCATTACCC  | R | MONO        |
| rs3824738  | 94208177 | C/T | HapMap                          |                                  |                           |   | MONO        |
| rs489517   | 94209484 | C/A | AGCGGATAACGTGCAATTCCATTGCAGCAC  | AGCGGATAACACACCCATCTAAATCTTCCCC  | AAAATTTCCATTAGGTAGGTATAT  | R | MONO        |
| rs9420586  | 94209510 | A/C | AGCGGATAACGTGCAATTCCATTGCAGCAC  | AGCGGATAACACACCCATCTAAATCTTCCCC  | TAAAAATTCTAAGAAGGATAGT    | R | Failed geno |
| rs2247348  | 94209597 | C/T | AGCGGATAACGCTTTAAGAGATTCACACCG  | AGCGGATAACGATTTAGATGGTGTGAACCTC  | TTTTTTTTTTTGAGACAGAGTCT   | F | MONO        |
| rs520711   | 94210625 | A/T | AGCGGATAACAGGCACAGTTTCGCTCTGTC  | AGCGGATAACGAGTGGAGATCATGCCACTG   | TCATGCCACTGCACTCC         | R | MONO        |
| rs7098739  | 94211102 | A/T | AGCGGATAACCTCCAAGACTCTTAAGTATCC | AGCGGATAACAATCACTTGAACCCAGGAGG   | GAGTGAAACTCTGTCTCAAAAAAA  | R | Failed geno |
| rs551266   | 94212604 | G/A | AGCGGATAACCCACGTCCAGCCTACTTATA  | AGCGGATAACTAGGTACACGGCAAATGCTC   | AAATGCTCAATAAATGAGAGA     | R |             |
| rs1042444  | 94213696 | G/A | AGCGGATAACTGGGCTATATCGTCTTCAGC  | AGCGGATAACGTGGCTTTTCTGACTGGATG   | TGACTGGATGATGAATCTCAAGC   | R | MONO        |
| rs1887922  | 94214145 | T/C | HapMap                          |                                  |                           |   |             |
| rs10882066 | 94214726 | A/G | HapMap                          |                                  |                           |   |             |
| rs2275218  | 94215277 | T/C | AGCGGATAACGGTCTACTTAGAGAGACTTG  | AGCGGATAACGTCCATAAGATAGTGATTGC   | TTTTAGAAGTGGATTCTCTGT     | R |             |
| rs7893352  | 94216829 | C/T | AGCGGATAAACCATCTCCTTTATAATGCTTG | AGCGGATAACTGCAATGAGCCATGATTGTG   | GTGCCAGAGTGACAGACTGTCTC   | R | MONO        |
| rs11187014 | 94217818 | G/C | AGCGGATAACATCCTACTTCTCCTTCCAGG  | AGCGGATAACCAAGTCCAGAGGTAGATGTG   | TAGATGTGATTATTTCTAGCTGG   | F | MONO        |
| rs7920976  | 94219726 | A/T | HapMap                          |                                  |                           |   | MONO        |
| rs4646957  | 94219892 | T/C | AGCGGATAACAGCAAGAGGGTTGAGTAAAC  | AGCGGATAACTCCCTCTAGTCTTTCTCAAG   | CCAGCATGGTGTGATAAG        | R |             |
| rs2250090  | 94221786 | A/G | AGCGGATAACAAACAACCTCAGTGTGAGAGG | AGCGGATAACTGAAGTTCTTGCTACCCTGG   | GCTGAATGATTTAGAGTCACTGAA  | F |             |
| rs2149632  | 94222227 | T/C | HapMap                          |                                  |                           |   |             |
| rs2249960  | 94223100 | A/G | AGCGGATAACCCCTCAGTGTGTATCTAATG  | AGCGGATAACAAAGGGTGATACCAATCTAC   | GATACCAATCTACATTTTTTTCCA  | F |             |
| rs12245118 | 94224735 | A/T | AGCGGATAACAGTGAAAGAGACATGCGTTC  | AGCGGATAACGAAAGAAGGGAAATATCCTAG  | GACTTTTGAAATGATTTTTTAAAG  | R | MONO        |
| rs7073248  | 94227390 | C/T | AGCGGATAACTGATAGGCAAGAACCTCAGC  | AGCGGATAACAGTCTAGTTCCTACAGTAGG   | GAAAAATGATGTGCTTGCC       | R |             |
| rs6583815  | 94227782 | A/G | AGCGGATAACACGAGTACCCCAAAATGCTC  | AGCGGATAACCCCTTTTATGGCACACATTC   | GCACACATTCATCTTCACTTT     | R |             |
| rs12411941 | 94227902 | C/T | AGCGGATAACCAAGCTTGAAACACATTC    | AGCGGATAACTAGCATGCACCATTACCTAC   | ACTTTATGTGTGTTTTAAATAA    | R | MONO        |
| rs5030982  | 94229152 | G/T | AGCGGATAACTACAGTGAAGGGGTCCAC    | AGCGGATAACTGTCAACATTTTCTTCCAG    | CATTTTCTTCCAGCCCATT       | F | MONO        |
| rs7910605  | 94229773 | A/G | AGCGGATAACCTGTGGTGGTTTGTGTTCTTG | AGCGGATAACAACAGCAGCCAAAAGTAGGG   | AGCCAAAAGTAGGGAAAAAT      | F |             |
| rs12356508 | 94231074 | G/A | AGCGGATAAATTCTTGGGCTCAAGTGATCC  | AGCGGATAACAAATGCTACATCCAGCCTGG   | GTAGTCCCAGCTACTCAG        | F | MONO        |
| rs12243214 | 94233186 | C/T | AGCGGATAACGAGGAGGACAGAAGCAATAG  | AGCGGATAACCTGCTGACTCTTGAGTATGC   | CATGGGACAGCAACTCCA        | R | MONO        |
| rs2421940  | 94233597 | A/G | AGCGGATAACATAAAAAGACACCGCGGCTTG | AGCGGATAACAGAGTTGCTTGACATGGCAG   | AGGAGGGAAAGTGAAGTGA       | R |             |
| rs10882067 | 94234248 | T/C | AGCGGATAACCCTGTAATCCCAGCACTTTG  | AGCGGATAACTTTTGTGTTTTGGCCAGGC    | TCTCGAACTCCTGGCCTCAAGTC   | R | Failed geno |
| rs11595475 | 94234883 | G/T | AGCGGATAACTGGGCAATGGAATGCGAGTC  | AGCGGATAACCTGGGTAACAAGAGCGAAAC   | CAAGAGCGAAAAGTCTGTC       | R | MONO        |
| IDE7       | 94235058 | A/T | AGCGGATAACCTTATGAATAAAAAAGCAGGG | AGCGGATAACAATGGCTACCTTTGAGATTG   | AATTATCAAAGAAGCAGTAAGTT   | F | MONO        |
| P539P      | 94236972 | G/T | AGCGGATAACAGAATGAATTTATTCCTACG  | AGCGGATAACCTTAATAAGAGCAGGGTATG   | TATGGTGTGCCTCTTTTTCTAA    | R |             |
| rs6583817  | 94237227 | C/T | AGCGGATAACCTACCAATCTATCGATGGG   | AGCGGATAACGATGTGGAGAGGAAGAGTAG   | TAGTACTAGAAAAGACTAECTCA   | R |             |
| rs11187019 | 94238290 | G/A | AGCGGATAACTGTAATCCCAGCACTTTGGG  | AGCGGATAACTCACAAATGTTGGCCAGACTG  | ACTCCTGACCTCGTGATC        | R | MONO        |

|            |          |     |                                 |                                  |                          |   |               |
|------------|----------|-----|---------------------------------|----------------------------------|--------------------------|---|---------------|
| rs12219148 | 94238396 | C/T | AGCGGATAACATTAGCCGGGTATGGTGGTG  | AGCGGATAACATGATTCTCCTGCCTCAGCC   | GCCTCCAAGTAGCTGA         | R | Failed geno   |
| rs11187020 | 94238730 | G/A | AGCGGATAAAGTCCACACCAGCTAGAGATC  | AGCGGATAACGGAGTAAAAAGCAACCAGCC   | AGCAACCAGCCTGGACA        | F | MONO          |
| rs7093418  | 94239749 | T/G | AGCGGATAACCCTGACTACTGATGAATGGG  | AGCGGATAACTGCCTCATGTTATAGCACCG   | GGAGAATTATGATTTTCAGAA    | R |               |
| rs3737225  | 94239962 | A/G | HapMap                          |                                  |                          |   |               |
| rs11187021 | 94242628 | A/G | AGCGGATAACAAATACTCTACCTGGCTGAC  | AGCGGATAACTGACAGGTGAGTCATCTTGC   | GAAAAGCAGATGACAAGAC      | R | MONO          |
| rs3781238  | 94243184 | A/T | AGCGGATAACACTCTTCCATGAAACGCTTG  | AGCGGATAACGTTTTCTTGTTCAGAGGGC    | GTTTCAGAGGGCAAGTCCAC     | F | MONO          |
| rs3781237  | 94243185 | C/T | HapMap                          |                                  |                          |   | MONO          |
| rs10882068 | 94243606 | C/T | AGCGGATAACATGAAAGGGTATGTATGAGG  | AGCGGATAACCACTCTGGTTCATAGGTATC   | TGTATACTCTGTCTGTACC      | R | MONO          |
| rs1855917  | 94244183 | C/T | AGCGGATAACCGTTGTGTTTTCTCATGTTTC | AGCGGATAACGCCAATATGGTAATGATGTG   | ATGGTAATGATGTGATCCTTA    | R | MONO          |
| rs1855916  | 94244263 | C/T | AGCGGATAACCGTTGTGTTTTCTCATGTTTC | AGCGGATAACCCTTAGAAAATGAGAGAACAGG | AGGCGAGTGGGTCACCT        | R |               |
| rs10882069 | 94245019 | G/A | AGCGGATAACATGGCGTCTCACTCTGTTGC  | AGCGGATAACTGTGCCTGTAGTCCCAGCTA   | GTGGTGAGCCAAGATCG        | R | Failed geno   |
| rs7075073  | 94245384 | A/G | AGCGGATAACACTCCTGACCTCAGGTGATC  | AGCGGATAACGTGGAAGGAGAGGGTTCATC   | CCTATTTAAAAATTATTGAGGC   | R | Failed geno   |
| rs11187024 | 94246000 | G/A | AGCGGATAACCAGTCAACTTTTACTGAGTTC | AGCGGATAACTTGCTATAGGTCATGTGTCC   | ATTTTGTCTTTCCAGAATTTGAC  | R | MONO          |
| rs7084090  | 94247198 | A/T | AGCGGATAACAATCCAAGGTGCTCAAGTCC  | AGCGGATAACACTTAGCTGGGATACTGCAG   | AGTACCATACTACACCATT      | F |               |
| rs11187025 | 94247956 | C/T | AGCGGATAACCACCTACTACTAGTCATGAG  | AGCGGATAACTCAGGACTGTCAACTCTGAG   | TGTCAACTCTGAGGTTTCA      | F |               |
| rs6583818  | 94247994 | G/T | AGCGGATAACGTCAACTCTGAGGTTTCACG  | AGCGGATAACCACCTACTACTAGTCATGAG   | TACTAGTCATGAGATCTTGGATA  | R | MONO          |
| rs11187026 | 94249117 | G/A | AGCGGATAACACTTTGGGAGACCAAAGTGG  | AGCGGATAACCGTAGAGATGAGGTTTTGCC   | TCTTGAACTCCTGACCTCA      | F | Failed geno   |
| rs11187028 | 94249288 | A/G | AGCGGATAACAAATTAGCAGGGTGTGGTGG  | AGCGGATAACTGATCATGGCTCACTGCAAC   | CTCAAGTGATCCTTCTGCCTCA   | F | Failed geno   |
| rs10786048 | 94249948 | C/T | AGCGGATAACATTAGCCAGACATGGTGGTG  | AGCGGATAACTCACTGAAACCTCCATCTCC   | ACCTCCATCTCCCAGTTTAAGC   | R | MONO          |
| rs7068618  | 94250507 | A/G | HapMap                          |                                  |                          |   |               |
| rs11187031 | 94251771 | T/G | AGCGGATAACCTTGACCTCTTGGGCTTAAG  | AGCGGATAACACAGGTATAGTGGCTTGCAC   | CACCCATAATCCCAGCTAC      | F |               |
| rs11187033 | 94252339 | T/A | AGCGGATAACGGGATGGCGAGATATAGTTC  | AGCGGATAACGGGAAAGTAGATTCCCTTAGG  | ATGTGTATCAGTGCCATATATCAC | F |               |
| rs1970244  | 94253203 | A/G | AGCGGATAACCTAGGAAATACTATTAGCCAG | AGCGGATAACTAGAAATTTTAGCTGAATCC   | TAGCTGAATCCTAGCATGA      | F | MONO          |
| rs11187037 | 94253341 | T/C | AGCGGATAAACCCACCTGAACATTAGAAGAC | AGCGGATAACGCTTCATTAGCGATAATTGC   | TTGCATATATAGACTTGCAC     | R |               |
| rs11187038 | 94254975 | C/T | AGCGGATAACGGGAAAACCACGAATGTTTC  | AGCGGATAACCCGCTTCCTAAATGTTTGTG   | TAAAAATCCTGTAGGTGTCA     | R | MONO          |
| rs11296200 | 94256855 | A/- | N/A                             |                                  |                          |   | Failed design |
| rs1832196  | 94258314 | C/T | AGCGGATAACAAATGGCGAAACCCCATCTC  | AGCGGATAACAGTGAGATGGTGGTTGTTGG   | GTGGTTGTTGGCACGCTGTTG    | F | Failed geno   |
| rs1832195  | 94258381 | A/G | AGCGGATAACACCATCTCACTCACTAACCC  | AGCGGATAACCTGGCTCTCATTTTCTCCTG   | TCCTGAATAGTGTCCATG       | F |               |
| rs6583819  | 94259587 | A/G | AGCGGATAAACAGGTGAAAATTTTGGAGG   | AGCGGATAACAGGTGGGAGGATCAATTCAG   | GGAGGATCAATTCAGCCAGGGA   | F |               |
| rs11187039 | 94259792 | G/A | AGCGGATAACATTTCTGAACACCTTTTCC   | AGCGGATAACCCTGTTCTATGGTAAACTAGG  | CAAAAATTTATGCACTTACTTTAA | F | MONO          |
| rs10882073 | 94260859 | A/G | N/A                             |                                  |                          |   | Failed design |
| rs11498516 | 94260983 | C/T | AGCGGATAACACATGGTGAACCCCTGTCTC  | AGCGGATAACCCAGGTTCAAGTGATTCTC    | AGTAGCTGGGATTACAGG       | F | Failed HW     |
| rs17445028 | 94261156 | C/T | AGCGGATAACGAGGAGACAGAATCAAGATG  | AGCGGATAACTACAGATGTGAGCCACCATG   | CCTGGCCAAAACCTGTCTTTTTA  | F |               |
| rs11187040 | 94262844 | C/T | AGCGGATAACACAGAGTGAGACTCCATCTC  | AGCGGATAACGGACTGTAGAATGTGAGTTC   | ATGTGAGTTCCTAATACTATA    | F | Failed geno   |
| rs7910569  | 94263344 | A/C | AGCGGATAAACAGCATTTTAATACCATGGG  | AGCGGATAACGCACATGTTTTGTAAACAGC   | ACAGCTTTTGTCTCTTTA       | F | Failed geno   |
| rs4646956  | 94264650 | T/C | AGCGGATAACAACACTGTGAAAAAGCCAAC  | AGCGGATAACGCTGTTTGTGTTTTAGGTCG   | GTGTTTTAGGTCGAGGTAAGA    | R | MONO          |
| rs9633693  | 94265538 | C/G | AGCGGATAACTAAGACACTTTTAGGCCGGG  | AGCGGATAACTTCTCCATGTTGGTCAGGC    | CTTGAACCTCCGACCTCAGGTGAT | F | MONO          |
| rs7895832  | 94266506 | A/T | AGCGGATAACGCCAAGTTACTTGTGAAAG   | AGCGGATAACCTACATACATCGCTGGAGAG   | AAAATAGCATTGCATCCTTTTT   | R |               |
| rs6583820  | 94266635 | A/G | HapMap                          |                                  |                          |   |               |
| rs7075851  | 94267766 | C/T | HapMap                          |                                  |                          |   |               |
| rs10509645 | 94267846 | A/C | HapMap                          |                                  |                          |   |               |
| rs11812558 | 94271124 | C/T | AGCGGATAACACAGAAGACAGGAACTTG    | AGCGGATAACCCACCACTCCAGTCTGATAT   | TTTTTTTTTACTGCACCCCT     | R |               |
| rs11187042 | 94271625 | T/C | AGCGGATAACGAACACTAACTGGATATTTG  | AGCGGATAACCATTTCCATTACCCCTTTTG   | TAAATATTTAGTATATATCTCT   | R | MONO          |

|            |          |     |                                  |                                  |                           |   |             |
|------------|----------|-----|----------------------------------|----------------------------------|---------------------------|---|-------------|
| rs10882074 | 94271665 | T/G | AGCGGATAACCATTTCCATTCACCCTTTTG   | AGCGGATAACGAACACTAACTGGATATTTG   | ATATTTATGAGCAAAATGATATC   | F |             |
| rs11187043 | 94271861 | T/G | AGCGGATAACCTCCTGATCCTGTGGTAAAC   | AGCGGATAACAAATAAGGGTGGGAGGGAAG   | GGAGGGAAGAGAGAAAAAAG      | F | MONO        |
| rs11187044 | 94272258 | T/G | AGCGGATAAECTCTCTCCTCTCTGTACTC    | AGCGGATAACAAGGAAGAGCCATTCAAGGG   | GGGAAAAAGAAAAGGAACTA      | R | MONO        |
| rs7915971  | 94272698 | T/C | AGCGGATAACGTGTCATTGCACTCAAGGTG   | AGCGGATAACACACTCAGTGAAATCCTGGG   | ATCCTGGGTTTGCCTTGCT       | F | MONO        |
| rs4933233  | 94273091 | C/T | AGCGGATAAECTGTAGTGAGCCGAGATCATG  | AGCGGATAAECTGTGCCAGCAAGTAAAAG    | GGGTTTCTTCTGTCAATTCA      | R | MONO        |
| rs11187045 | 94273349 | A/T | AGCGGATAACCTTTCTTTCACTTGCTGGG    | AGCGGATAACGTATTTTAGGTGTGCGTGAC   | CCTCCTAGGTTTAAAGTGGT      | R | MONO        |
| rs11187046 | 94273981 | A/G | AGCGGATAAECTGAGGCAGAACTGCTTGAAC  | AGCGGATAACAGTCTCACTCTGTCCACCAAG  | CACAATCTCAGCTTACCG        | R | MONO        |
| rs4641376  | 94275508 | A/C | AGCGGATAAECTGCCAACAGTGAACAATCTG  | AGCGGATAACGAGGGCTTTTTTGTGTGTG    | ATAAATGGGATTGCTTTCTTG     | R |             |
| rs11187055 | 94276174 | C/T | AGCGGATAACAGATTGTGCATATGAAGCCC   | AGCGGATAAECTTTTTCAGAACTCTACTGTCC | AGAATCCTACTGTCTTTTCACAG   | F | MONO        |
| rs10882077 | 94276465 | C/T | AGCGGATAAECTAGCTGAGTGTGGTAGTGTG  | AGCGGATAAECTTTGGCACTCTGTAACTC    | CCAGCCTCCCAAGTAGCTGA      | R | MONO        |
| rs2421942  | 94277360 | C/G | AGCGGATAACCAATTACAGGAAAATGCTGG   | AGCGGATAACGGCATTCTTTTATATCCATTAC | TATATCCATTACATATTTCTTG    | F |             |
| rs7078413  | 94280464 | A/C | HapMap                           |                                  |                           |   |             |
| rs17107709 | 94282086 | G/T | AGCGGATAACGCAGGTCATAGTTTTTAGGC   | AGCGGATAAECTTTGTCTAAGGTGCCTGAG   | AGGTGCCTGAGTCTAAGTGAA     | R |             |
| rs4646955  | 94284271 | A/G | AGCGGATAACATGAAGCCATCTCTGTGGAA   | AGCGGATAACACAGGTAATGCAGAATACCC   | ATTATCCAACTTTGTGTACTTA    | R |             |
| rs7077418  | 94285778 | A/G | AGCGGATAACCAACAGAGTGAGACTCTGTC   | AGCGGATAACCATGGGCACATTTCTTACAC   | CAGGTTGCTTCTTTTTTTTTTT    | R | Failed geno |
| rs2275221  | 94286967 | C/T | AGCGGATAACCTGAAACAACCTGCAGTTTACC | AGCGGATAACACTCAATAGTTACCGTTCC    | ACCTTATTTTATACCAGAACCCCTC | R | MONO        |
| rs1832197  | 94288311 | A/G | HapMap                           |                                  |                           |   |             |
| rs12416180 | 94290376 | A/T | AGCGGATAAACACAGTTGTGGTTTGGACAG   | AGCGGATAAECTTTCTCTGTGGTGCCTGAC   | GAGTTTGACTTAGGTAACCAAAA   | F |             |
| rs10882078 | 94292030 | T/C | AGCGGATAAACTATAGCCTCAACATCCCG    | AGCGGATAACAAATTAGCTGGGTACGGTGG   | CGGTGGTGAGTGCCTAT         | R |             |
| rs11815736 | 94292741 | T/C | AGCGGATAACGTGACCTTTTCACTCTTCTC   | AGCGGATAACGTGAGTAGGAAGCAAAAAGC   | AAAGCAAAAGTAAAATTTCCCA    | R | MONO        |
| rs11187060 | 94294112 | C/T | AGCGGATAACCTTAAGTGGTGGGTCGTAAC   | AGCGGATAAECTATGCAAGCACTGACTGAGC  | GAGTTGAAGAGGATGACTGC      | R | MONO        |
| rs7915349  | 94294428 | A/G | HapMap                           |                                  |                           |   |             |
| rs11187061 | 94295389 | T/C | AGCGGATAAACCATGCTTGCCCTAAGCAAAG  | AGCGGATAAECTCACACCAACTTCATGCCAC  | GCCACCACTGAAGCCTCAAT      | R |             |
| rs11187062 | 94296406 | T/C | AGCGGATAAECTTGCCACAAGAAATAGGAG   | AGCGGATAACGTAATGAGTAAAGTCCTGAG   | AACTTAGTTGACTGATGCTGT     | R | MONO        |
| rs10218994 | 94296563 | A/G | AGCGGATAACGTTGAGGGGAGAATTTATTC   | AGCGGATAACAACCTTGACACTTCCAGTAAC  | ACTTCCAGTAACTAATAGCTAA    | F | MONO        |
| rs11187064 | 94298233 | T/C | AGCGGATAAECTGCATCACACTCAGACAACC  | AGCGGATAAECTACCAGGAACTATGCCTTGG  | GGAACATATGCCTTGGTGAAGTTT  | R |             |
| rs10219017 | 94298446 | G/A | AGCGGATAAECTACCTGGTTTCTAATAGTC   | AGCGGATAAECTTCTGAGGTCAAAAAC      | CTGGAGGTCAAAAACATTCATTA   | F | MONO        |
| rs7909636  | 94299843 | C/T | AGCGGATAACGCAGGAGAATCTCTTGAACC   | AGCGGATAACAGTTTTTGTAGTGGCCAGG    | ATGGCGTGATCTCAGCTTGCTGC   | R |             |
| rs10882079 | 94300414 | G/C | AGCGGATAACAGAGATAGCGCCACTACACT   | AGCGGATAACAGAAACGGGGTTTACCATG    | GTTTACCATGTTGGCCA         | R | Failed HW   |
| rs2421943  | 94301795 | A/G | AGCGGATAAECTGTTACATATTCTTTATCAC  | AGCGGATAACGTTGTTAGGTTAGTTTGTAG   | TGTTAGAATATTGATTGTTTCTCA  | R | Failed HW   |
| rs11187065 | 94301904 | C/T | AGCGGATAAACACATTGAAGGAGTGTAAAAG  | AGCGGATAACGTAGTTCTTTTTCTTTAGGC   | CTTAGGCTTTATTGTATCCAGTCA  | R |             |
| rs4406744  | 94302165 | T/A | AGCGGATAACCGGAGAAGGCTACAATTGTGG  | AGCGGATAAECTGGACAGCCACATATACAG   | ATTTCTATGTCTTTTTGTATATA   | R | MONO        |
| rs1987122  | 94303116 | A/G | AGCGGATAACACAGAGTCTCACTCTGTTGC   | AGCGGATAAECTTGTGTAACCTTGGGAGGC   | TTGCAGTGAGCCAAGACT        | F | Failed geno |
| rs6583821  | 94304548 | T/C | AGCGGATAACAATTGCTTGAACCTGGGAGG   | AGCGGATAAECTTGTGCTCAGGCTAGAGTG   | AGGCTAGAGTGCAAGAGT        | R | Failed geno |
| rs10882080 | 94304589 | T/C | AGCGGATAAECTGCATGTGGCATCTGAAAGC  | AGCGGATAAECTTAGCCTGAGCAACAAGAG   | GCAACAAGAGCAAAATTTCCA     | F | MONO        |
| rs7908111  | 94304784 | A/G | AGCGGATAACACCTCCATTGTGTACTTCAG   | AGCGGATAACGGCTTTCAGCTTTTCACTGC   | GTTTGCTTGTCTTCCATGGC      | R |             |
| rs10882081 | 94305004 | A/G | AGCGGATAAECTTTCACCATGTTGGTCAAGC  | AGCGGATAACAATCACACTAAAGAGGCCGG   | AACACTTTGGGAGCTGAG        | F | Failed geno |
| rs7917163  | 94306808 | C/A | AGCGGATAACGTTTCATGGATGGGAAGACAG  | AGCGGATAACGGTCTCTGCATTTCCAAAC    | TGTCATTTCTGCAAAAAGGAG     | R |             |
| rs7394234  | 94307486 | G/A | AGCGGATAAECTGGCGAAGATGGTGAACAC   | AGCGGATAAECTCCGCCTCCAGGTTTAAAC   | AGGTGTTGGCCACCATG         | R |             |
| rs11187066 | 94307851 | A/G | AGCGGATAAECTTTTGTCTTGTGCCCAGG    | AGCGGATAACACAGGAGAATCGCTTGAACC   | GGACGTTGCGGTGAGCTGAGATCA  | R | Failed geno |
| rs7098744  | 94308049 | C/T | AGCGGATAAECTCTCAAACCTGACCTCAG    | AGCGGATAAECTTATTGGCCAGGCATGGTG   | CTGTAATCCTAGCACTTTG       | R | MONO        |
| rs11187067 | 94309312 | T/C | AGCGGATAACATGAATGGTCCAGAACAGGC   | AGCGGATAACCACTCTATTCCACTCTTCCC   | GCAGCCACTCATCTTTCTTTCT    | R |             |
| rs1999763  | 94309972 | A/G | HapMap                           |                                  |                           |   |             |

|            |          |     |                                  |                                  |                          |   |               |
|------------|----------|-----|----------------------------------|----------------------------------|--------------------------|---|---------------|
| rs1999764  | 94310119 | T/C | AGCGGATAACAGCCATCTTGCTCCAAAAGG   | AGCGGATAACAGAGAGGGAGAAAAGAGAGC   | GAGTGTAAATGTAACAAGGTAGGG | R |               |
| rs11187069 | 94310846 | C/T | AGCGGATAACGAGACCAGCTTGCCCAACAT   | AGCGGATAACTGCCATCTCGGCTTACTGCA   | CCACCACCGTGCCCGCT        | R | Failed geno   |
| rs10882083 | 94311953 | C/G | AGCGGATAACGACCGACTATAAATGAGGTC   | AGCGGATAACGCAAAACATATCCACATGCC   | TATCCACATGCCACATCC       | F |               |
| rs4933729  | 94313002 | A/C | AGCGGATAACAAGAGCAAACTCCACCTCG    | AGCGGATAACTAAGGAGCTGGAACACTACAGG | GATGGGGGTTTCCACATG       | R |               |
| rs11187071 | 94314015 | C/T | AGCGGATAACGAGACTATCCTTCAGGACAC   | AGCGGATAACGGCAACCATTCTGTAGCAAG   | TGTAGCAAGCCTGGAGAAAA     | F | MONO          |
| rs11187072 | 94314389 | C/T | AGCGGATAAATTGCAGTAAGCCGAGACTGC   | AGCGGATAACCCCACTTGATCTTATGGTCC   | GAGACAGTCTCGCTTTATC      | R | Failed HW     |
| rs11187073 | 94314708 | T/C | AGCGGATAAACTCAGGTGATCAACCCACCTC  | AGCGGATAACGCTGGGCATAACAAAGCAAC   | GATCAAGAAATAACAGTAGCCAGG | F | Failed geno   |
| rs7076966  | 94315491 | C/T | AGCGGATAACAATGCTTCTGCAGATCTCC    | AGCGGATAACGGGACGTTAAAACAGGGAG    | TCTGAAGTGATTACTGGATA     | R |               |
| rs2421944  | 94316150 | A/T | N/A                              |                                  |                          |   | Failed design |
| rs7100623  | 94317136 | C/T | HapMap                           |                                  |                          |   |               |
| rs12355977 | 94317963 | G/C | AGCGGATAAAGTCAAGTATGCCCTGGTATC   | AGCGGATAACCCTGAAATTTGAGGGAGAGG   | GGGAGAGGTTCTGGCTA        | F |               |
| rs7915220  | 94318582 | C/T | AGCGGATAACACAAGGGCAGACTCTTTCTC   | AGCGGATAACTTATAACTCTGCTCCTCCCC   | CTGCTCCTCCCCTGTAAGGTATT  | R |               |
| rs10882084 | 94319093 | A/G | AGCGGATAAAGTTCAGCCTTCTGTCTCC     | AGCGGATAACCCACTGGTGATATTTAGGCG   | CGAGACAACAGCTTGGG        | F | MONO          |
| rs7097014  | 94320200 | A/C | AGCGGATAACATATGTTAGGTTCTGGAGCC   | AGCGGATAACGTGATCACTACAGAGTAGAC   | GAAAACAGACTGAAGACAAGCCAA | F |               |
| rs4304670  | 94321119 | C/T | HapMap                           |                                  |                          |   |               |
| rs2421945  | 94321321 | G/A | AGCGGATAACCCTTGTCTGTGTTTCAGCTG   | AGCGGATAACGGGAATGGGCTATTATCTCC   | CTATTATCTCCAGGTGCCCA     | F |               |
| rs10736067 | 94321742 | G/C | AGCGGATAACATGAGCCAGCTAGAAAGCTC   | AGCGGATAACCTAATCCCTTTGGTTGGACC   | TCTCAAAGCCTCACTCACT      | F | MONO          |
| rs7909487  | 94322696 | A/G | AGCGGATAACTATGTGTCTGCCTTCCAAGG   | AGCGGATAACCACACCCCTTGAGCTATCTC   | CCCAATCCGCTCCAATC        | F | MONO          |
| rs12783634 | 94323222 | A/G | AGCGGATAACTAAAGGAATCCGGCGACTTC   | AGCGGATAACACTCAGTGCCCGGAGAAAAG   | AGGGCTGAGGGCAAGGT        | F |               |
| rs4646954  | 94323807 | G/A | AGCGGATAACAAAACCCGGAGCAGCTACCTC  | AGCGGATAACATCACCGCAAACGCTTCCCTG  | CAAACGCTTCTGCTTGCCTTC    | F | Failed geno   |
| rs4646953  | 94323935 | A/G | AGCGGATAACAAAACCCCTGTCCCTCCAGTC  | AGCGGATAACTTTGCTGAGCCGGATGG      | GCAGGCGAGGACGGTGA        | F |               |
| rs3758505  | 94324758 | T/G | AGCGGATAACGGAACCCCTCCTACTGAATTC  | AGCGGATAACACAGACGATCAAGACTGCAG   | AAAAACGGGTGCTCTTAGTCCA   | R |               |
| rs7099761  | 94325779 | A/G | AGCGGATAACGAAGGAGCCATGTACAATGC   | AGCGGATAACAAGAGGAGGTGGATGGAAGG   | GGTGGATGGAAGAAAAGTA      | F |               |
| rs3758503  | 94326684 | C/T | AGCGGATAACGGAAGGAACCTACAGCACAG   | AGCGGATAACTGCTGAAGTCATTCTTTGCC   | CATTCTTGCCTTAGATAGGAAA   | R |               |
| rs7921325  | 94328632 | T/A | AGCGGATAAAGTACAGAGTGCAGTCTGTC    | AGCGGATAACGAACAGCTGAGGAACATTGG   | GTCTCAAAGACATTTTTTTTT    | F | Failed geno   |
| rs7905037  | 94328678 | A/G | AGCGGATAACAGAGGTTGCAGTGAGCCAAG   | AGCGGATAACGAACAGCTGAGGAACATTGG   | CCCAGGCTGGAGTGCAATG      | F | Failed geno   |
| rs11187077 | 94330087 | G/T | AGCGGATAACATGCCTGTAATCCCAGCTAC   | AGCGGATAACAATCTCAGCTCACTGCACTC   | AAGCAATTCTCCTGCCTCAG     | R | MONO          |
| rs11187078 | 94330685 | C/G | AGCGGATAACGATCCTGATTTGAACAAAACCC | AGCGGATAACATCCACAGGCACTAACATAC   | CCTGAGTGTTCCCACTTT       | F |               |
| rs11187079 | 94331572 | C/T | AGCGGATAACGCTAACACAGTGAACAAAACCC | AGCGGATAAAGTCCGATTCCCTGGTTAAGC   | GGTTTAAGCAATTCTGTCTCAAC  | F |               |
| rs11187080 | 94333545 | C/T | AGCGGATAACAAGTCTGTAATCTGGGAGG    | AGCGGATAAAGTCTGCTTGTGCCCAGG      | GCTGGAGTGCAATGCCA        | F | Failed geno   |
| rs6583823  | 94334395 | C/T | HapMap                           |                                  |                          |   |               |
| rs2421941  | 94335889 | G/A | AGCGGATAACATCCTCTCTGCATTTCTTC    | AGCGGATAACGAAATGCTCAGCTATGAACAG  | CAGCTATGAACAGACATAAT     | R |               |
| rs11187081 | 94337053 | C/T | AGCGGATAAAGTACAGGTATGAGCTGCCATG  | AGCGGATAACCGTGTGTTGCTCTGGCATTTC  | CTTTCAGGAGTATATGTACTTCTC | R | MONO          |
| rs6583826  | 94337810 | G/A | AGCGGATAACAGGCTGAGTAGTTTGACAAC   | AGCGGATAACGGCCCATGTAAGTGTGTTTG   | ACTAAGCAGTCCCTGAAATGT    | R |               |
| rs7911019  | 94338815 | A/T | AGCGGATAACAAGAGAAAAGGAAAGACGGCC  | AGCGGATAACATAGGCACAAGCCACCAGAC   | AGCCACCAGACCTGGCT        | R | MONO          |
| rs1889894  | 94340487 | A/G | AGCGGATAACGACCTATCTCCACCCTAATC   | AGCGGATAACTCAACAGGACTCCACTACAC   | CACGTGGAGGAATCAAAG       | F | MONO          |
| rs12355158 | 94340661 | G/A | AGCGGATAACAGAAGGAGCTGTAGATGCAG   | AGCGGATAACTTCTCCACTTGCTAATCCC    | CCCCTACATGCGCCCCC        | R |               |
| rs11595187 | 94341915 | C/T | AGCGGATAACAGGAGTTTGAGACCAGTCTG   | AGCGGATAACTAGATGGGACAAAAGGCAC    | ACACCAGGCTATTTTTTCCC     | F | Failed geno   |
| rs2297743  | 94342803 | C/G | HapMap                           |                                  |                          |   |               |
| rs3824736  | 94344062 | C/T | HapMap                           |                                  |                          |   | MONO          |
| rs11187085 | 94344692 | A/G | AGCGGATAAAGTGGTGCCTGTCATTAAGC    | AGCGGATAACAAAAGGCTTACCAACCCCTG   | GAGGACCTCGCAACTCATAAGT   | R |               |
| rs11187086 | 94344951 | A/C | AGCGGATAAAGTTCCTCCACTTCAGCCTCTC  | AGCGGATAAAGTGGTAAACCCCATCTCTAC   | AAAATACAAAATTAGCCAGGCAT  | R | Failed geno   |
| rs11817798 | 94345504 | G/A | AGCGGATAACGCTAAGTGGAAATGAGCAAG   | AGCGGATAAAGTTCCTCTCCATCAACC      | CATCAACCCGACACCTACCATT   | F |               |

|            |          |     |                                 |                                  |                          |   |             |
|------------|----------|-----|---------------------------------|----------------------------------|--------------------------|---|-------------|
| rs11187087 | 94346261 | G/A | AGCGGATAACACCCAATGGATGGCTACTTG  | AGCGGATAACCAACAGTGCATAAGGGTTCC   | TCTCCACATCCTCACCAAC      | F |             |
| rs4604791  | 94346892 | C/T | AGCGGATAACCAGGGTTTCTTCTGCTTTGG  | AGCGGATAACACATTGTGTCAGATCCTTTGGC | CCTTTGGCATCAGGAGAA       | R |             |
| rs6583827  | 94348003 | A/T | AGCGGATAACGTTGGACCCTTATCTAACAC  | AGCGGATAACTCCATTGTGAAGCTTTTGCC   | TTTTTGATCCATTTTGAGTTAAT  | F |             |
| rs11187089 | 94349194 | G/A | AGCGGATAACAGGAGAATCGCTTGAACCTG  | AGCGGATAACACAGAGTCTCACTCTGTTGC   | TGGCTCACCACAACCTC        | R | MONO        |
| rs12218324 | 94349700 | A/T | AGCGGATAACAATAAACAGAAAGTTCAATAG | AGCGGATAACCAAGTTCTGGGATTACAGC    | TGCCTGGCTTTTTTTTTTTTTT   | F | Failed geno |
| rs12411873 | 94350841 | C/T | AGCGGATAACAAAGGTTGAGGGCCAAGAGC  | AGCGGATAACCTTGAACCTGACCTCGTG     | CTCCTGACCTCGTGATCCATC    | F |             |
| rs7096101  | 94352908 | G/A | AGCGGATAACGGTGAAGATAGTTGGTTGC   | AGCGGATAACTGGCTCCCTTGCTTTTTAGG   | TCTGCTTAAATATCACCTGC     | F |             |
| rs4933731  | 94353973 | C/T | HapMap                          |                                  |                          |   |             |
| rs10882086 | 94355005 | T/C | AGCGGATAACAGTGTAGACCTTCTGTGTC   | AGCGGATAACTGTCCACACAACACTGTGAG   | CAACACTGTGAGGTTGGTAAT    | R |             |
| rs10786050 | 94357210 | A/G | AGCGGATAACTCAATGGAAGAGGAAGGACC  | AGCGGATAACTCTGCTCCAACCTTCTGTC    | CCATTCTGTCATAAATAGAC     | R |             |
| rs10882088 | 94358568 | T/C | AGCGGATAACAATGCTCAGGGATGAAGATG  | AGCGGATAACTACAACAGTCTGTTCTACAG   | CAGTCTGTTCTACAGTAGTCTTC  | R |             |
| rs11599330 | 94360614 | A/G | AGCGGATAACAGATCATGGAATTTTGGATG  | AGCGGATAACTTCCATTTTATTGGAAAGCC   | TTGGAAAGCCATTAAGTGAAAAT  | R |             |
| rs2275219  | 94362922 | A/G | AGCGGATAACAAGCTAATCACCCAGTGACC  | AGCGGATAACGAAGTGGTAAGCATCCACC    | CTCTTAAACACCTTATAGAGCAGC | R |             |
| rs10882091 | 94364357 | C/T | AGCGGATAAAGTGTAGGTTGGTGTATG     | AGCGGATAACTTCTAAGCAGCCTCTACC     | ACCACACTAGCGAGCATTCACTTG | R |             |
| rs12252836 | 94366308 | C/A | AGCGGATAACTATCCTAAGGGTCGAGACTC  | AGCGGATAACTAAGACCACTATGCCCAACC   | CCCAACCTTTAAAAAGGAAGTT   | R |             |
| rs11187100 | 94367517 | A/C | AGCGGATAACTGCACTGAGTCAAGATCGTG  | AGCGGATAACAAAATGGTACTTCACTACGG   | TGAGATGAAGTCTCGCTCTTTCA  | F |             |
| rs11187101 | 94367754 | C/A | AGCGGATAACAAAACCATATTGGGGCCAGG  | AGCGGATAACTCCTGACCTCGTAATCTG     | AAATGCTGGGATCACAGG       | F | Failed geno |
| rs10882092 | 94369203 | G/A | AGCGGATAACCTTGGGCAATTATCCCAGAG  | AGCGGATAACGTCCATGGTGAGTATGTACC   | AACTGCTATTGACATTCATTTATA | F |             |
| rs12260688 | 94369694 | C/T | HapMap                          |                                  |                          |   |             |
| rs12781567 | 94369814 | C/T | AGCGGATAACAGCGAGACTCCGTCTCAAAA  | AGCGGATAACAAGCAGTAGTGTCTTCTTCC   | ATGTAATGTCTGGTCTTTG      | F | MONO        |
| rs7084441  | 94370112 | C/T | AGCGGATAACCAAAGTGTCTGGGATTACAGG | AGCGGATAACAAGCATGTGTCCTGCCTTTC   | CCTATAAGAACTATACCTCTGGCC | R | Failed geno |
| rs11187102 | 94371489 | A/C | AGCGGATAACCAAGTAGCTGGGATTATAGG  | AGCGGATAACAACAAAATAGAAGCCTAGGC   | AATTAGCAGGGTGTGGTG       | R | Failed geno |
| rs7914814  | 94372930 | C/T | HapMap                          |                                  |                          |   |             |
| rs7898506  | 94372946 | A/G | HapMap                          |                                  |                          |   |             |
| rs10082524 | 94373182 | T/C | AGCGGATAACGCTTCTGGTTATTATTAGGTC | AGCGGATAACCCTGATTGTGTTTATCCTTG   | AGATATTAGGAAGCAAGACTT    | F |             |
| rs10882093 | 94374055 | C/T | AGCGGATAACTATAGTGGTGTGATCTCGGC  | AGCGGATAACTTGTAAATCCCAGCTACTCGG  | AGAATCACTGAACCTGGGAG     | R | MONO        |
| rs11187106 | 94375670 | C/G | AGCGGATAACCTTCTTATCCATGAGCATGG  | AGCGGATAACTGAAGGATCTCTACGGTAAG   | GAAAGAAATCAGAGTTGACA     | F | MONO        |
| rs1573051  | 94377314 | A/G | AGCGGATAACCATCCCTGTCTCTCTTTTG   | AGCGGATAACTGACAGATATCACACAGGG    | AAGATCCCAAAGGAAAGAAAA    | F |             |
| rs10882094 | 94377656 | A/T | HapMap                          |                                  |                          |   |             |
| rs12244924 | 94378087 | G/T | AGCGGATAACAGGTATCTTAGAAGGAAGG   | AGCGGATAACAGTGGTGTGTTGTGCGTGTG   | GTCTCAGTTTTTAACCCCTAA    | F |             |
| rs7068540  | 94379401 | A/G | AGCGGATAACGCCACCCTCATATTAATACC  | AGCGGATAACTGAGGCTGCAGTAAGATATG   | TATGATTACACCACTGCAC      | R |             |
| rs9731595  | 94381028 | C/T | AGCGGATAACCTTTCATCATCAGAACATAC  | AGCGGATAACTGCAGTGAACCGAGATCATG   | GTAACAGAGCAAGACTCTGT     | F | Failed geno |
| rs2275217  | 94382267 | A/G | HapMap                          |                                  |                          |   | MONO        |
| rs11818705 | 94382708 | C/T | HapMap                          |                                  |                          |   |             |

Genotyping assays for 243 SNPs in *IDE*, showing the sequences of the PCR primers and the extension probe, its direction (forward or reverse) and reasons for assay failure. Position is according to the NCBI 35 release. HapMap, SNPs and genotypes obtained from the HapMap website ([www.hapmap.org](http://www.hapmap.org)). Failed design, failed assay design on Sequenom platform; failed HW, failed Hardy-Weinberg equilibrium in the CEPH reference panel; failed geno, genotyping rate <75% or >1 Mendel errors; MONO, monomorphic SNP in the CEPH reference panel.

Supplementary Table 2: Genotype counts of individual SNPs in *IDE*

Allele counts for each of the 21 single-marker (top) and 13 multi-marker (bottom) tests in our diabetic subsamples; within each SNP, the major allele is presented first. The components of the multi-marker tags (bottom panel) are numbered as in the top panel, and correspond to those in Table 2.

Multi-marker haplotypes were assigned [frequency](#) probabilities according to an expectation-maximization algorithm, and are compared versus all other possibilities at those loci (see text for details). T, transmitted; U, untransmitted; C/C, case/control.

| Test Tag | Alleles    | Scandinavian trios |       | Canadian C/C |              | Scandinavian C/C |               | Sweden C/C    |               | Scandinavian sib pairs (cases) |                 |    |
|----------|------------|--------------------|-------|--------------|--------------|------------------|---------------|---------------|---------------|--------------------------------|-----------------|----|
|          |            | T                  | U     | Cases        | Controls     | Cases            | Controls      | Cases         | Controls      | Excess allele 1                | Excess allele 2 |    |
| 1        | rs2263638  | C/T                | 124   | 108          | 153 / 73     | 140 / 86         | 621 / 323     | 623 / 321     | 644 / 348     | 648 / 328                      | 69              | 69 |
| 2        | rs2209972  | C/T                | 96    | 107          | 160 / 64     | 162 / 64         | 663 / 291     | 652 / 290     | 644 / 304     | 628 / 294                      | 71              | 76 |
| 3        | rs967878   | C/A                | 124   | 117          | 132 / 90     | 132 / 92         | 548 / 390     | 492 / 430     | 480 / 414     | 497 / 375                      | 82              | 67 |
| 4        | rs884526   | G/T                | 108   | 125          | 164 / 64     | 165 / 61         | 662 / 290     | 654 / 292     | 682 / 320     | 665 / 319                      | 74              | 74 |
| 5        | rs12257053 | T/C                | 48    | 27           | 197 / 27     | 199 / 27         | 846 / 78      | 822 / 102     | 865 / 111     | 875 / 81                       | 36              | 25 |
| 6        | rs11186994 | C/T                | 125   | 138          | 163 / 65     | 165 / 63         | 651 / 299     | 657 / 291     | 675 / 329     | 660 / 328                      | 73              | 79 |
| 7        | rs10882063 | G/T                | 112   | 100          | 137 / 83     | 141 / 81         | 564 / 356     | 518 / 396     | 561 / 389     | 574 / 366                      | 79              | 68 |
| 8        | rs2251101  | T/C                | 86    | 108          | 151 / 73     | 149 / 75         | 717 / 219     | 725 / 217     | 746 / 244     | 725 / 241                      | 64              | 70 |
| 9        | rs4646958  | T/A                | 54    | 44           | 196 / 32     | 199 / 27         | 859 / 93      | 861 / 87      | 894 / 112     | 914 / 76                       | 34              | 19 |
| 10       | rs1887922  | T/C                | 33    | 42           | 179 / 47     | 180 / 46         | 776 / 176     | 776 / 168     | 799 / 147     | 773 / 153                      | 48              | 52 |
| 11       | rs2275218  | T/C                | 23    | 17           | 221 / 7      | 221 / 5          | 866 / 58      | 849 / 61      | 870 / 38      | 897 / 29                       | 13              | 15 |
| 12       | rs2250090  | G/A                | 16    | 12           | 202 / 26     | 197 / 25         | 923 / 15      | 903 / 23      | 892 / 24      | 910 / 30                       | 2               | 8  |
| 13       | rs2249960  | A/G                | 15    | 11           | 198 / 20     | 179 / 25         | 836 / 76      | 838 / 80      | 820 / 86      | 809 / 87                       | 22              | 28 |
| 14       | rs11187031 | T/G                | 104   | 81           | 177 / 49     | 168 / 46         | 691 / 265     | 712 / 234     | 721 / 251     | 694 / 276                      | 81              | 58 |
| 15       | rs4641376  | C/A                | 91    | 93           | 183 / 45     | 179 / 41         | 785 / 165     | 779 / 171     | 833 / 161     | 823 / 149                      | 57              | 36 |
| 16       | rs10882083 | C/G                | 156   | 153          | 136 / 92     | 122 / 102        | 577 / 379     | 570 / 378     | 579 / 421     | 562 / 420                      | 60              | 76 |
| 17       | rs12355977 | G/C                | 67    | 40           | 208 / 18     | 193 / 21         | 854 / 102     | 850 / 96      | 877 / 97      | 862 / 102                      | 31              | 41 |
| 18       | rs4646953  | A/G                | 91    | 78           | 180 / 46     | 185 / 43         | 721 / 225     | 734 / 198     | 786 / 200     | 737 / 241                      | 64              | 48 |
| 19       | rs10882086 | T/C                | 56    | 43           | 198 / 28     | 191 / 23         | 867 / 87      | 854 / 90      | 888 / 88      | 904 / 64                       | 33              | 22 |
| 20       | rs12252836 | C/A                | 32    | 31           | 204 / 24     | 192 / 30         | 859 / 41      | 863 / 43      | 716 / 30      | 710 / 26                       | 18              | 21 |
| 21       | rs12260688 | C/T                | 7     | 17           | 223 / 3      | 207 / 5          | 930 / 18      | 914 / 28      | 934 / 38      | 936 / 30                       | 5               | 6  |
| 22       | 21,20,11   | C,C,T              | 46.8  | 48.5         | 194 / 34     | 186.9 / 41.1     | 834 / 122     | 814.7 / 137.3 | 883.4 / 120.6 | 891.6 / 98.4                   | 37              | 45 |
| 23       | 20,8       | A,C                | 16.5  | 23.4         | 21.1 / 206.9 | 27.1 / 198.9     | 42.2 / 913.8  | 42 / 908      | 38 / 962      | 32.9 / 955.1                   | 16              | 15 |
| 24       | 18,10      | A,T                | 85.8  | 89           | 135.2 / 92.8 | 140.2 / 87.8     | 552.1 / 403.9 | 576.9 / 371.1 | 635.1 / 356.9 | 580.7 / 405.3                  | 85              | 75 |
| 25       | 18,15      | G,A                | 35.7  | 27.6         | 13.7 / 214.3 | 12.4 / 215.6     | 78.7 / 877.3  | 76.5 / 875.5  | 65.7 / 940.3  | 80.6 / 907.4                   | 24              | 31 |
| 26       | 16,8       | G,T                | 109.8 | 109.9        | 67.5 / 160.5 | 74.3 / 153.7     | 330.3 / 625.7 | 329.5 / 622.5 | 344.7 / 659.3 | 352 / 636                      | 93              | 77 |
| 27       | 16,10      | C,T                | 115.4 | 119.1        | 88.8 / 139.2 | 78.1 / 147.9     | 400.1 / 555.9 | 401.5 / 548.5 | 421.6 / 578.4 | 400.9 / 587.1                  | 66              | 86 |
| 28       | 15,9       | A,A                | 34    | 35.4         | 31 / 197     | 27 / 201         | 83.5 / 872.5  | 85.9 / 866.1  | 101.9 / 904.1 | 65.4 / 926.6                   | 21              | 33 |
| 29       | 15,14,11   | C,T,T              | 113.4 | 112.5        | 141.5 / 86.5 | 145.3 / 82.7     | 540.8 / 415.2 | 556 / 396     | 610.4 / 395.6 | 608.1 / 383.9                  | 101             | 76 |
| 30       | 15,14      | C,T                | 101   | 98.6         | 147.5 / 80.5 | 146.8 / 79.2     | 600.8 / 355.2 | 619.9 / 332.1 | 652.4 / 353.6 | 640.1 / 351.9                  | 99              | 71 |
| 31       | 11,9       | T,T                | 55.9  | 55.5         | 190.5 / 37.5 | 198 / 30         | 804.5 / 149.5 | 802.4 / 149.6 | 856.4 / 149.6 | 888.5 / 103.5                  | 47              | 35 |
| 32       | 10,7       | C,G                | 45.9  | 38.7         | 39.5 / 188.5 | 36.6 / 191.4     | 162 / 792     | 153.4 / 798.6 | 140.3 / 857.7 | 147.9 / 836.1                  | 56              | 54 |
| 33       | 7,2        | T,T                | 90.2  | 75.8         | 57.7 / 168.3 | 53.7 / 174.3     | 257 / 699     | 271.7 / 680.3 | 274.8 / 723.2 | 270.2 / 715.8                  | 70              | 72 |
| 34       | 6,2        | C,C                | 87    | 99           | 160 / 68     | 164 / 64         | 653 / 303     | 658 / 292     | 670.7 / 335.3 | 659.7 / 330.3                  | 80              | 85 |

Supplementary Table 3: Correlation of *IDE* SNPs to tagging tests selected by *Tagger*

| SNP ID           | Position | MAF  | Allele captured | Tagging test         | Number | Genotype | $r^2$ |
|------------------|----------|------|-----------------|----------------------|--------|----------|-------|
| rs2263638        | 94158777 | 0.30 | C               | rs2263638            | 1      | C        | 1.00  |
| rs7086285        | 94166068 | 0.41 | T               | rs967878             | 3      | C        | 1.00  |
| <b>rs2209972</b> | 94169008 | 0.31 | C               | rs2209972            | 2      | C        | 1.00  |
| <b>rs967878</b>  | 94169328 | 0.41 | C               | rs967878             | 3      | C        | 1.00  |
| <b>rs884526</b>  | 94170442 | 0.30 | G               | rs884526             | 4      | G        | 1.00  |
| rs11594898       | 94173942 | 0.01 | T               | Not captured         | N/A    | N/A      | 0.00  |
| rs12257053       | 94175650 | 0.07 | T               | rs12257053           | 5      | T        | 1.00  |
| rs7909013        | 94178323 | 0.33 | T               | rs2209972            | 2      | C        | 0.89  |
| rs10786044       | 94180560 | 0.33 | A               | rs11186994,rs2209972 | 34     | C,C      | 0.96  |
| rs11186993       | 94182794 | 0.28 | C               | rs11186994           | 6      | C        | 0.92  |
| rs11186994       | 94184819 | 0.28 | C               | rs11186994           | 6      | C        | 1.00  |
| rs10786045       | 94185388 | 0.28 | T               | rs10882063,rs2209972 | 33     | T,T      | 0.92  |
| rs10882063       | 94189317 | 0.37 | G               | rs10882063           | 7      | G        | 1.00  |
| rs2798253        | 94192885 | 0.36 | G               | rs10882083,rs2251101 | 26     | G,T      | 0.93  |
| rs11186999       | 94193961 | 0.08 | G               | rs4641376,rs4646958  | 28     | A,A      | 1.00  |
| rs4933231        | 94196162 | 0.15 | T               | rs2275218,rs4646958  | 31     | T,T      | 1.00  |
| rs10786047       | 94197028 | 0.15 | A               | rs2275218,rs4646958  | 31     | T,T      | 1.00  |
| rs11187004       | 94199011 | 0.15 | T               | rs2275218,rs4646958  | 31     | T,T      | 1.00  |
| rs7910977        | 94199856 | 0.15 | C               | rs2275218,rs4646958  | 31     | T,T      | 1.00  |
| <b>rs2251101</b> | 94201284 | 0.22 | T               | rs2251101            | 8      | T        | 1.00  |
| rs4646958        | 94204339 | 0.10 | T               | rs4646958            | 9      | T        | 1.00  |
| rs6583814        | 94206524 | 0.18 | A               | rs2275218,rs4646958  | 31     | T,T      | 0.83  |
| rs11187009       | 94207018 | 0.30 | G               | rs11187031           | 14     | T        | 0.96  |
| <b>rs551266</b>  | 94212604 | 0.16 | A               | rs1887922            | 10     | T        | 1.00  |
| <b>rs1887922</b> | 94214145 | 0.16 | T               | rs1887922            | 10     | T        | 1.00  |
| rs10882066       | 94214726 | 0.08 | G               | rs4641376,rs4646958  | 28     | A,A      | 1.00  |
| <b>rs2275218</b> | 94215277 | 0.08 | T               | rs2275218            | 11     | T        | 1.00  |
| rs4646957        | 94219892 | 0.43 | T               | rs10882083,rs1887922 | 27     | C,T      | 0.97  |
| <b>rs2250090</b> | 94221786 | 0.02 | G               | rs2250090            | 12     | G        | 1.00  |
| rs2149632        | 94222227 | 0.35 | C               | rs10882083,rs2251101 | 26     | G,T      | 0.96  |
| <b>rs2249960</b> | 94223100 | 0.08 | A               | rs2249960            | 13     | A        | 1.00  |
| rs7073248        | 94227390 | 0.16 | T               | rs1887922            | 10     | T        | 1.00  |
| rs6583815        | 94227782 | 0.15 | A               | rs2275218,rs4646958  | 31     | T,T      | 1.00  |
| rs7910605        | 94229773 | 0.15 | A               | rs2275218,rs4646958  | 31     | T,T      | 1.00  |
| rs2421940        | 94233597 | 0.08 | G               | rs4641376,rs4646958  | 28     | A,A      | 1.00  |
| P539P            | 94236972 | 0.03 | G               | rs12260688           | 21     | C        | 0.36  |
| rs6583817        | 94237227 | 0.15 | C               | rs2275218,rs4646958  | 31     | T,T      | 1.00  |
| rs7093418        | 94239749 | 0.16 | G               | rs1887922            | 10     | T        | 1.00  |
| rs3737225        | 94239962 | 0.08 | G               | rs2275218            | 11     | T        | 0.89  |
| rs1855916        | 94244263 | 0.16 | C               | rs1887922            | 10     | T        | 1.00  |
| rs7084090        | 94247198 | 0.16 | T               | rs1887922            | 10     | T        | 1.00  |
| rs11187025       | 94247956 | 0.26 | C               | rs4646953            | 18     | A        | 1.00  |
| rs7068618        | 94250507 | 0.08 | A               | rs4641376,rs4646958  | 28     | A,A      | 1.00  |
| rs11187031       | 94251771 | 0.29 | T               | rs11187031           | 14     | T        | 1.00  |

|                  |          |      |   |                                |    |       |      |
|------------------|----------|------|---|--------------------------------|----|-------|------|
| rs11187033       | 94252339 | 0.35 | A | rs10882083,rs2251101           | 26 | G,T   | 0.96 |
| rs11187037       | 94253341 | 0.08 | C | rs4641376,rs4646958            | 28 | A,A   | 1.00 |
| rs1832195        | 94258381 | 0.03 | A | rs12260688                     | 21 | C     | 0.49 |
| rs6583819        | 94259587 | 0.16 | G | rs1887922                      | 10 | T     | 1.00 |
| rs17445028       | 94261156 | 0.26 | T | rs4646953                      | 18 | A     | 1.00 |
| rs7895832        | 94266506 | 0.08 | T | rs4641376,rs4646958            | 28 | A,A   | 1.00 |
| rs6583820        | 94266635 | 0.08 | G | rs4641376,rs4646958            | 28 | A,A   | 1.00 |
| rs7075851        | 94267766 | 0.08 | T | rs4641376,rs4646958            | 28 | A,A   | 1.00 |
| rs10509645       | 94267846 | 0.35 | A | rs10882083,rs2251101           | 26 | G,T   | 0.96 |
| rs11812558       | 94271124 | 0.05 | C | rs12252836,rs2251101           | 23 | A,C   | 0.85 |
| rs10882074       | 94271665 | 0.35 | G | rs10882083,rs2251101           | 26 | G,T   | 0.96 |
| rs4641376        | 94275508 | 0.19 | C | rs4641376                      | 15 | C     | 1.00 |
| rs2421942        | 94277360 | 0.07 | C | rs2275218                      | 11 | T     | 0.88 |
| rs7078413        | 94280464 | 0.38 | A | rs4641376,rs11187031           | 30 | C,T   | 0.93 |
| rs17107709       | 94282086 | 0.02 | T | rs2250090                      | 12 | G     | 1.00 |
| rs4646955        | 94284271 | 0.31 | A | rs11187031                     | 14 | T     | 0.92 |
| rs1832197        | 94288311 | 0.47 | G | rs4641376,rs11187031,rs2275218 | 29 | C,T,T | 0.90 |
| rs12416180       | 94290376 | 0.08 | T | rs4641376,rs4646958            | 28 | A,A   | 1.00 |
| rs10882078       | 94292030 | 0.08 | C | rs4641376,rs4646958            | 28 | A,A   | 1.00 |
| rs11187060       | 94294112 | 0.41 | T | rs10882083,rs2251101           | 26 | G,T   | 0.87 |
| rs11187061       | 94295389 | 0.16 | C | rs1887922                      | 10 | T     | 1.00 |
| rs11187064       | 94298233 | 0.31 | T | rs11187031                     | 14 | T     | 0.92 |
| rs7909636        | 94299843 | 0.16 | T | rs1887922                      | 10 | T     | 1.00 |
| rs11187065       | 94301904 | 0.26 | T | rs4646953                      | 18 | A     | 1.00 |
| rs7908111        | 94304784 | 0.16 | G | rs1887922                      | 10 | T     | 1.00 |
| rs7917163        | 94306808 | 0.13 | C | rs1887922,rs10882063           | 32 | C,G   | 1.00 |
| rs7394234        | 94307486 | 0.08 | A | rs4641376,rs4646958            | 28 | A,A   | 1.00 |
| rs11187067       | 94309312 | 0.26 | T | rs4646953                      | 18 | A     | 1.00 |
| rs1999763        | 94309972 | 0.08 | A | rs4641376,rs4646958            | 28 | A,A   | 1.00 |
| rs1999764        | 94310119 | 0.08 | C | rs4641376,rs4646958            | 28 | A,A   | 1.00 |
| rs10882083       | 94311953 | 0.42 | C | rs10882083                     | 16 | C     | 1.00 |
| rs4933729        | 94313002 | 0.15 | A | rs1887922                      | 10 | T     | 0.94 |
| rs7076966        | 94315491 | 0.42 | C | rs10882083                     | 16 | C     | 1.00 |
| rs7100623        | 94317136 | 0.16 | C | rs1887922                      | 10 | T     | 1.00 |
| rs12355977       | 94317963 | 0.12 | G | rs12355977                     | 17 | G     | 1.00 |
| rs7915220        | 94318582 | 0.08 | T | rs4641376,rs4646958            | 28 | A,A   | 1.00 |
| rs7097014        | 94320200 | 0.15 | C | rs1887922                      | 10 | T     | 0.94 |
| rs4304670        | 94321119 | 0.43 | C | rs10882083,rs1887922           | 27 | C,T   | 1.00 |
| rs2421945        | 94321321 | 0.43 | A | rs10882083,rs1887922           | 27 | C,T   | 1.00 |
| rs12783634       | 94323222 | 0.13 | A | rs4646953,rs4641376            | 25 | G,A   | 0.93 |
| <b>rs4646953</b> | 94323935 | 0.26 | A | rs4646953                      | 18 | A     | 1.00 |
| rs3758505        | 94324758 | 0.08 | G | rs4641376,rs4646958            | 28 | A,A   | 1.00 |
| rs7099761        | 94325779 | 0.44 | A | rs10882083                     | 16 | C     | 0.90 |
| rs3758503        | 94326684 | 0.07 | C | rs4641376,rs4646958            | 28 | A,A   | 0.88 |
| rs11187078       | 94330685 | 0.33 | G | rs10882083,rs2251101           | 26 | G,T   | 0.90 |
| rs11187079       | 94331572 | 0.08 | T | rs4641376,rs4646958            | 28 | A,A   | 1.00 |
| rs6583823        | 94334395 | 0.44 | C | rs10882083                     | 16 | C     | 0.90 |
| rs2421941        | 94335889 | 0.39 | T | rs4646953,rs1887922            | 24 | A,T   | 0.90 |

|            |          |      |   |                                 |    |       |      |
|------------|----------|------|---|---------------------------------|----|-------|------|
| rs6583826  | 94337810 | 0.49 | G | rs10882083                      | 16 | C     | 0.74 |
| rs12355158 | 94340661 | 0.36 | A | rs10882083,rs2251101            | 26 | G,T   | 0.93 |
| rs2297743  | 94342803 | 0.07 | G | rs10882086                      | 19 | T     | 1.00 |
| rs11187085 | 94344692 | 0.18 | A | rs12260688,rs12252836,rs2275218 | 22 | C,C,T | 1.00 |
| rs11817798 | 94345504 | 0.05 | G | rs12260688                      | 21 | C     | 1.00 |
| rs11187087 | 94346261 | 0.05 | G | rs12260688                      | 21 | C     | 1.00 |
| rs4604791  | 94346892 | 0.05 | C | rs12260688                      | 21 | C     | 1.00 |
| rs6583827  | 94348003 | 0.40 | T | rs4646953,rs1887922             | 24 | A,T   | 0.81 |
| rs12411873 | 94350841 | 0.06 | C | rs10882086                      | 19 | T     | 0.87 |
| rs7096101  | 94352908 | 0.39 | A | rs4646953,rs1887922             | 24 | A,T   | 0.84 |
| rs4933731  | 94353973 | 0.07 | C | rs10882086                      | 19 | T     | 1.00 |
| rs10882086 | 94355005 | 0.07 | T | rs10882086                      | 19 | T     | 1.00 |
| rs10786050 | 94357210 | 0.40 | G | rs4646953,rs1887922             | 24 | A,T   | 0.81 |
| rs10882088 | 94358568 | 0.07 | T | rs10882086                      | 19 | T     | 1.00 |
| rs11599330 | 94360614 | 0.03 | A | rs10882086                      | 19 | T     | 0.36 |
| rs2275219  | 94362922 | 0.07 | A | rs10882086                      | 19 | T     | 1.00 |
| rs10882091 | 94364357 | 0.39 | T | rs4646953,rs1887922             | 24 | A,T   | 0.84 |
| rs12252836 | 94366308 | 0.07 | C | rs12252836                      | 20 | C     | 1.00 |
| rs11187100 | 94367517 | 0.05 | C | rs12260688                      | 21 | C     | 1.00 |
| rs10882092 | 94369203 | 0.36 | A | rs10882083,rs2251101            | 26 | G,T   | 0.93 |
| rs12260688 | 94369694 | 0.05 | C | rs12260688                      | 21 | C     | 1.00 |
| rs7914814  | 94372930 | 0.39 | C | rs4646953,rs1887922             | 24 | A,T   | 0.84 |
| rs7898506  | 94372946 | 0.05 | G | rs12260688                      | 21 | C     | 1.00 |
| rs10082524 | 94373182 | 0.07 | T | rs12252836                      | 20 | C     | 1.00 |
| rs1573051  | 94377314 | 0.36 | G | rs10882083,rs2251101            | 26 | G,T   | 0.93 |
| rs10882094 | 94377656 | 0.39 | A | rs4646953,rs1887922             | 24 | A,T   | 0.84 |
| rs12244924 | 94378087 | 0.05 | T | rs12260688                      | 21 | C     | 1.00 |
| rs7068540  | 94379401 | 0.03 | A | rs12260688                      | 21 | C     | 0.49 |
| rs11818705 | 94382708 | 0.05 | C | rs12260688                      | 21 | C     | 1.00 |

The *Tagger* algorithm (<http://www.broad.mit.edu/mpg/tagger>) was used to select single and multi-marker tests to capture all SNPs of minor allele frequency (MAF)  $\geq 5\%$  with an  $r^2 \geq 0.8$  (see text for details). SNPs previously associated with type 2 diabetes or related phenotypes (8-10) were forced in as tags and are shown in bold. Five SNPs that are less well captured at  $r^2 < 0.8$  have MAF  $< 5\%$ ; a sixth SNP (rs6583826) which had been selected as a tag but failed genotyping in the disease samples was captured by rs10882083 with  $r^2 = 0.74$ .
